# Supplementary material for: Exploring the influence of iron substitution in lithium rich layered oxides Li2Ru1−xFexO3: triggering the anionic redox reaction
Source: Royal Society of Chemistry journal article supplement (doi:10.1039/c7ta04194b), 2017-01-01
Supplement: c7ta04194b1.pdf [file c7ta04194b1.pdf]

## Supplementary Information

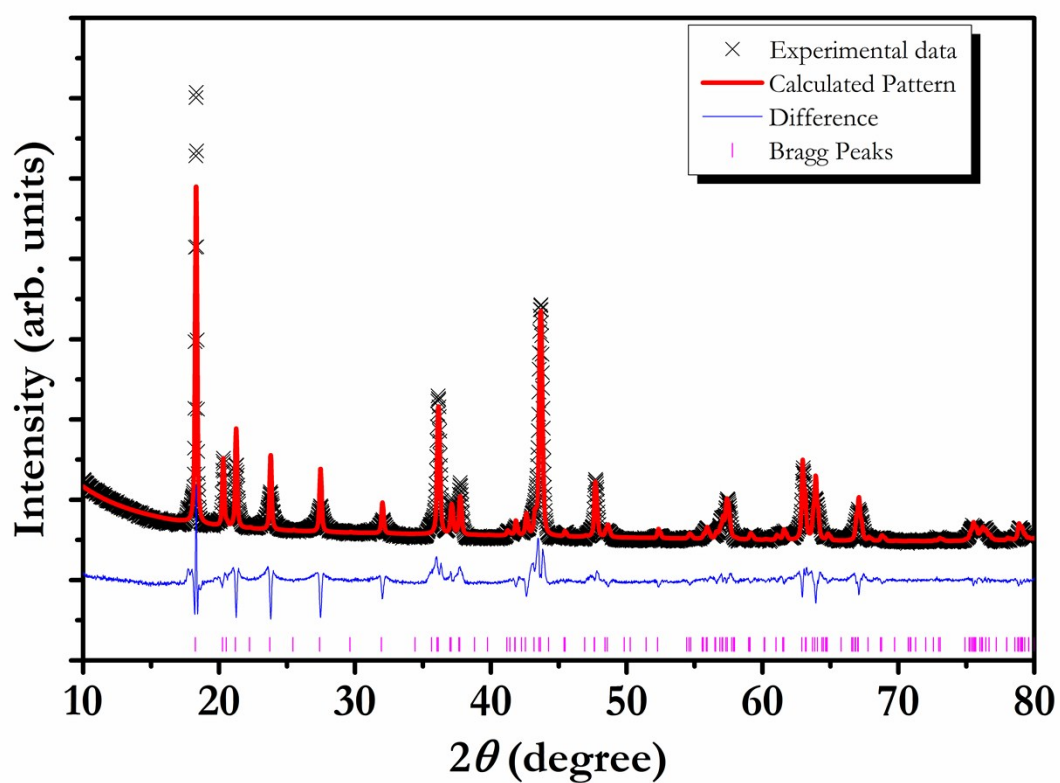

Figure S 1: Rietveld refinement of LRFO

**Table S1** Rietveld Refined lattice parameters and crystallite sizes of LRO, LRTO and LRFO

| <b>Phase</b>                  | <b>LRO</b> | <b>LRTO</b> | <b>LRFO</b> |
|-------------------------------|------------|-------------|-------------|
| <b>Space Group</b>            | C 2/c      | C 2/c       | C 2/c       |
| <b>a(Å)</b>                   | 4.91(4)    | 5.03(1)     | 5.04(4)     |
| <b>b(Å)</b>                   | 8.76(1)    | 8.72(7)     | 8.75(6)     |
| <b>c(Å)</b>                   | 9.85(5)    | 9.84(8)     | 9.84(9)     |
| <b><math>\beta</math> (°)</b> | 99.96(5)   | 99.79(7)    | 99.89(5)    |
| <b>Crystallite Size (nm)</b>  | 143.9      | 138.5       | 133.5       |

**Table S2:** Fe K-edge EXAFS parameters for 8 different voltage points. Only the first nearest neighbour is considered in the fitting.

| Voltage | Path            | $N$   | $\Delta E_0$ [eV] | $R_{\text{eff}}$ [ $\text{\AA}$ ] | $\sigma^2$ [ $\text{\AA}^{-2}$ ] |
|---------|-----------------|-------|-------------------|-----------------------------------|----------------------------------|
| 3.0 V   |                 | 6     | 1.553             | 2.013                             |                                  |
| 3.7 V   |                 | 5.675 | 1.011             | 2.005                             |                                  |
| 3.8 V   |                 | 5.635 | 0.973             | 1.996                             |                                  |
| 4.6 V   | [Fe] – O – [Fe] | 4.040 | 0.795             | 1.907                             | 0.0068                           |
| 3.8 V   |                 | 4.421 | -1.762            | 1.900                             |                                  |
| 3.6 V   |                 | 4.484 | -12.628           | 1.892                             |                                  |
| 3.0 V   |                 | 5.293 | -9.254            | 1.924                             |                                  |
| 2.0 V   |                 | 5.397 | -9.257            | 1.950                             |                                  |

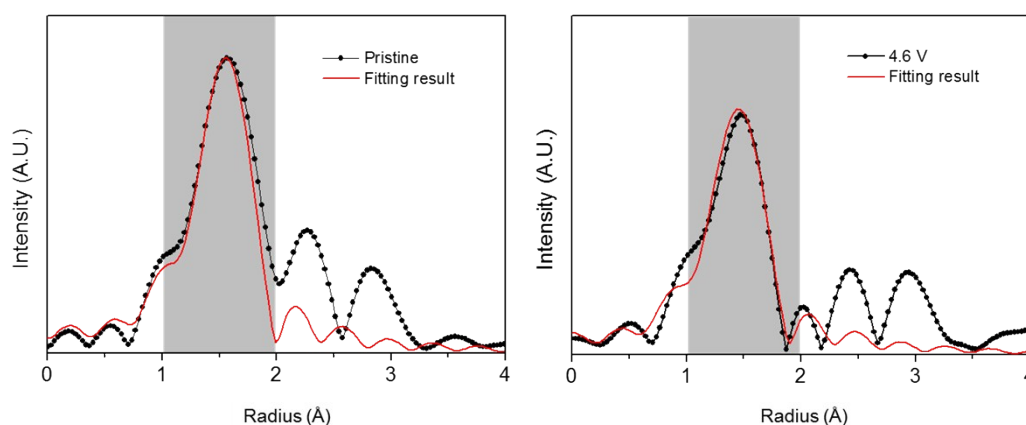

**Figure S2.**  $k^2$ -weighted EXAFS spectra for (Left) 3.0 V during charging and (right) 4.6 V at fully charged state. The x-axis is proportional to the distance between the Fe and neighboring atoms, and the intensity in the y-axis is related to the number of atoms at that distance. The grey area means a fitting range.

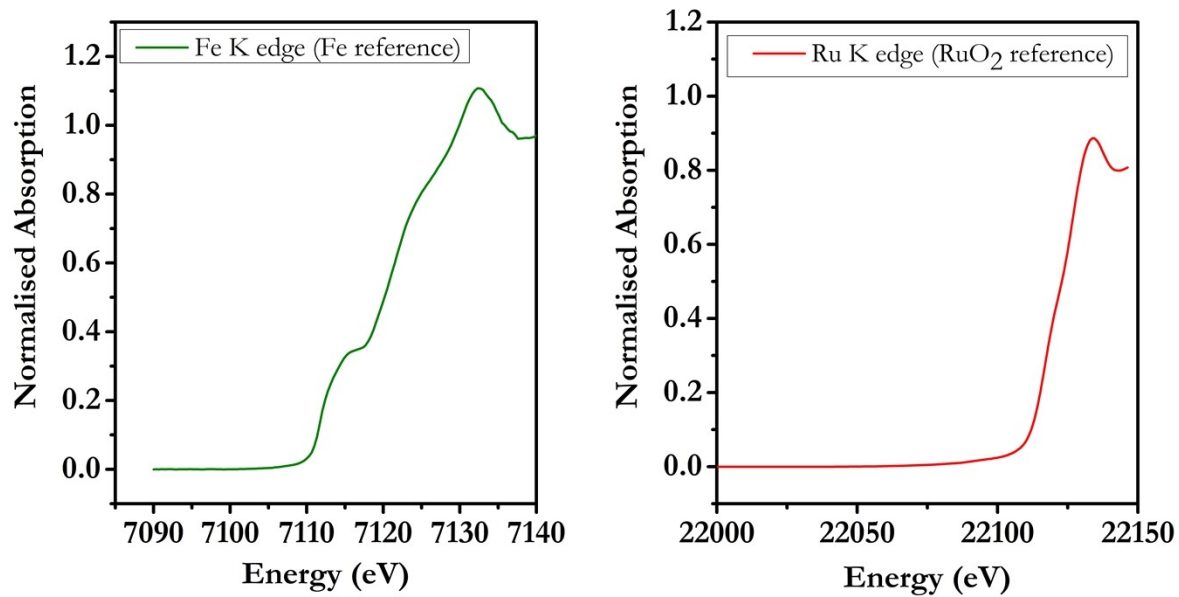

**Figure S3.** Reference XANES profiles collected for pure Iron powder and Ru in a RuO<sub>2</sub> complex

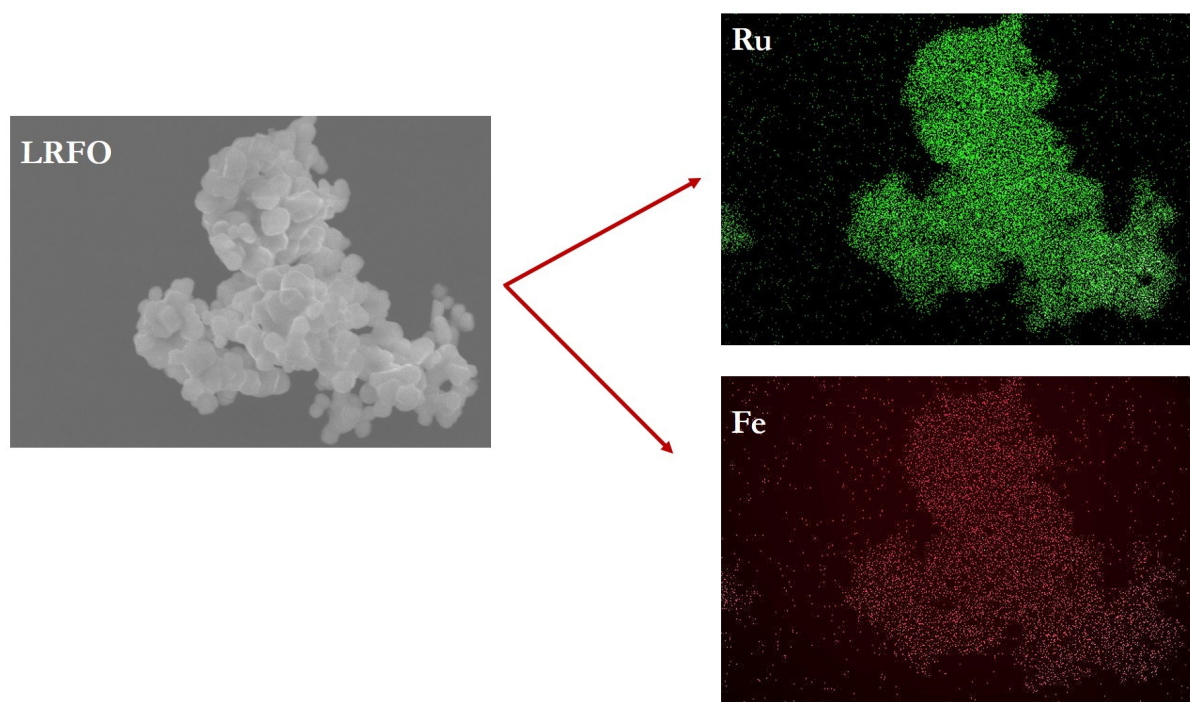

**Figure S4.** EDX map collected for LRFO indicating a uniform distribution of Ru and Fe in agglomerate without any hotspots.

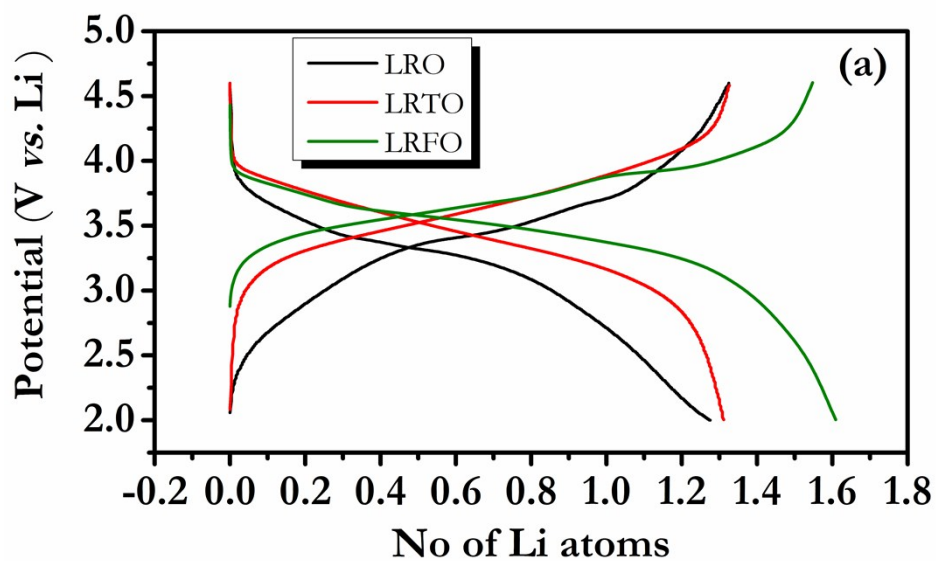

**Figure S5.** (a) Galvanostatic charge discharge profiles of LRO, LRTO and LRFO indicating the number of Li atoms that can be stored by each. Theoretical capacity for 1 Li atom was calculated by using their individual molecular weights.
